# Supplementary material for: Impact of preweaning vaccination on host gene expression and antibody titers in healthy beef calves
Source: Front Vet Sci. 2022 Sep 26;9:1010039. doi: 10.3389/fvets.2022.1010039 (PMC9549141; doi:10.3389/fvets.2022.1010039)
Supplement: Supplementary file 9 [file Table_9.xlsx]

## Sheet: Gene List
glmmSeq time:vaccine
ADAMTS1
ALDH1L2
ANKRD45
AOC3
AREG
BOLA-DQA5
CAPS2
CELSR3
CFAP53
CHN1
CLEC1B
DCT
EDIL3
EPB41L4A
GPRC5B
GRB14
HSD11B1
KANSL2
KRT1
LCAT
LMOD3
LOC100337053
LOC100337076
LOC100337244
LOC100847677
LOC100847970
LOC100848478
LOC100852061
LOC101903572
LOC101904355
LOC101904548
LOC101905165
LOC101907327
LOC101908237
LOC101909256
LOC104971023
LOC104975377
LOC107131247
LOC107131335
LOC107131878
LOC112441463
LOC112441504
LOC112443819
LOC112445470
LOC112445514
LOC112445693
LOC112445945
LOC112446038
LOC112446378
LOC112446786
LOC112447833
LOC112448544
LOC112448784
LOC112448847
LOC112449074
LOC511695
LOC529277
LOC530850
LOC531557
LOC617079
LOC617979
LOC781951
LOC783362
LOC787074
LOC789503
LOXL4
LRRC17
MPDZ
MYO18A
OAS1X
PALLD
PAX2
PCSK6
PLCB4
PRG3
RGS11
RND3
SH2D7
SLC4A5
SLC5A7
SULT1C4
TRPV4
WC1-8
WEE2
ZP2

## Sheet: Time_Vax Pathways
Term	Database	ID	Input number	Background number	P-Value	Corrected P-Value	Input	Hyperlink
Transport of small molecules	Reactome	R-HSA-382551	6	720	0.000310139	0.0230433	PCSK6|LCAT|SLC4A5|SLC5A7|ABCC4|TRPV4	http://www.reactome.org/cgi-bin/eventbrowser_st_id?ST_ID=R-HSA-382551
Immunoregulatory interactions between a Lymphoid and a non-Lymphoid cell	Reactome	R-HSA-198933	3	128	0.000632918	0.0313891	NKG2D|KIR2DS2|ULBP3	http://www.reactome.org/cgi-bin/eventbrowser_st_id?ST_ID=R-HSA-198933
Plasma lipoprotein remodeling	Reactome	R-HSA-8963899	2	28	0.000674711	0.0313891	LCAT|PCSK6	http://www.reactome.org/cgi-bin/eventbrowser_st_id?ST_ID=R-HSA-8963899
Natural killer cell mediated cytotoxicity	KEGG PATHWAY	hsa04650	3	131	0.000675943	0.0313891	NKG2D|KIR2DS2|ULBP3	http://www.genome.jp/kegg-bin/show_pathway?hsa04650/hsa:79465%09red/hsa:22914%09red/hsa:100132285%09red
Tyrosine metabolism	KEGG PATHWAY	hsa00350	2	36	0.00108333	0.0447174	AOC3|DCT	http://www.genome.jp/kegg-bin/show_pathway?hsa00350/hsa:8639%09red/hsa:1638%09red
DAP12 interactions	Reactome	R-HSA-2172127	2	39	0.00126055	0.0492942	NKG2D|KIR2DS2	http://www.reactome.org/cgi-bin/eventbrowser_st_id?ST_ID=R-HSA-2172127

## Sheet: Time_Vax GO Terms
Term	Database	ID	Input number	Background number	P-Value	Corrected P-Value	Input	Hyperlink
plasma membrane	Gene Ontology	GO:0005886	20	4619	3.62065e-07	0.000269014	KANSL2|AOC3|RGS11|CELSR3|PCSK6|ZP2|KIR2DS2|GRB14|ULBP3|PALLD|RND3|PRG3|TRPV4|CLEC1B|SLC5A7|ABCC4|MUC5B|DCT|NKG2D|GPRC5B	http://amigo.geneontology.org/amigo/term/GO:0005886
extracellular space	Gene Ontology	GO:0005615	11	1572	3.84344e-06	0.00142784	AREG|LOXL4|LRRC17|LCAT|PCSK6|KRT1|PRG3|ULBP3|MUC5B|SERPINB4|GPRC5B	http://amigo.geneontology.org/amigo/term/GO:0005615
protein binding	Gene Ontology	GO:0005515	30	11779	1.08616e-05	0.00207107	AOC3|PCSK6|MYO18A|KRT1|PRG3|MUC5B|NKG2D|AREG|ADAMTS1|ZP2|CLEC1B|TRPV4|DCT|MPDZ|ANKRD45|CHN1|PLCB4|KANSL2|LCAT|CELSR3|PAX2|LOXL4|GRB14|CFAP53|APOL2|PALLD|RND3|ULBP3|ABCC4|LMOD3	http://amigo.geneontology.org/amigo/term/GO:0005515
cell surface	Gene Ontology	GO:0009986	7	598	1.11498e-05	0.00207107	AREG|AOC3|PCSK6|MYO18A|TRPV4|NKG2D|GPRC5B	http://amigo.geneontology.org/amigo/term/GO:0009986
oxidation-reduction process	Gene Ontology	GO:0055114	6	525	5.68268e-05	0.00705055	AOC3|ALDH1L2|ABCC4|DCT|CYP4X1|HSD11B1	http://amigo.geneontology.org/amigo/term/GO:0055114
copper ion binding	Gene Ontology	GO:0005507	3	55	5.69358e-05	0.00705055	AOC3|LOXL4|DCT	http://amigo.geneontology.org/amigo/term/GO:0005507
collagen-containing extracellular matrix	Gene Ontology	GO:0062023	5	370	0.000114769	0.0121819	ADAMTS1|KRT1|ZP2|PCSK6|EDIL3	http://amigo.geneontology.org/amigo/term/GO:0062023
integral component of membrane	Gene Ontology	GO:0016021	14	3643	0.000132359	0.0122928	AREG|AOC3|CYP4X1|CELSR3|ZP2|KIR2DS2|TRGC1|PRG3|SLC5A7|ABCC4|TRPV4|DCT|NKG2D|GPRC5B	http://amigo.geneontology.org/amigo/term/GO:0016021
natural killer cell mediated cytotoxicity	Gene Ontology	GO:0042267	2	18	0.000297108	0.0230433	NKG2D|ULBP3	http://amigo.geneontology.org/amigo/term/GO:0042267
natural killer cell activation	Gene Ontology	GO:0030101	2	22	0.000430186	0.0289046	NKG2D|ULBP3	http://amigo.geneontology.org/amigo/term/GO:0030101
actin filament organization	Gene Ontology	GO:0007015	3	118	0.000502268	0.0289046	TRPV4|RND3|LMOD3	http://amigo.geneontology.org/amigo/term/GO:0007015
cytoplasmic vesicle	Gene Ontology	GO:0031410	4	285	0.000505733	0.0289046	TRPV4|RND3|ADAMTS1|MPDZ	http://amigo.geneontology.org/amigo/term/GO:0031410
actomyosin structure organization	Gene Ontology	GO:0031032	2	31	0.000816965	0.0357062	MYO18A|EPB41L4A	http://amigo.geneontology.org/amigo/term/GO:0031032
